# Supplementary material
Source: PubMed Central journal article supplement (PMC6778960)

# THE LANCET

## Haematology

### Supplementary appendix

This appendix formed part of the original submission and has been peer reviewed. We post it as supplied by the authors.

Supplement to: Ravandi F, Assi R, Daver N, et al. Idarubicin, cytarabine, and nivolumab in patients with newly diagnosed acute myeloid leukaemia or high-risk myelodysplastic syndrome: a single-arm, phase 2 study. *Lancet Haematol* 2019; published online Aug 7. [http://dx.doi.org/10.1016/S2352-3026\(19\)30114-0](http://dx.doi.org/10.1016/S2352-3026(19)30114-0).

**Supplementary table 1:** Baseline characteristics of responding patients compared to non-responders.

| Characteristics           | Responders (N=34) | Non-Responders (N=10) | P-Value |
|---------------------------|-------------------|-----------------------|---------|
| Age (years)               | 54 [26 – 66]      | 54 [36 – 65]          | 0.552   |
| Female                    | 19 (56)           | 8 (80)                | 0.273   |
| Secondary and t-AML       | 6 (18)            | 4 (40)                | 0.207   |
| WBC (x10 <sup>6</sup> /L) | 4.6 [0.4 – 40]    | 4.7 [0.5 – 46]        | 0.732   |
| Bone marrow blasts (%)    | 43 [14 – 96]      | 31 [13 – 93]          | 0.805   |
| Cytogenetics              |                   |                       |         |
| Diploid                   | 8 (24)            | 2 (20)                | >0.99   |
| -7/7q-/-5/complex         | 14 (41)           | 2 (20)                | 0.281   |
| Adverse ELN genetic risk  | 17 (50)           | 5 (50)                | >0.99   |
| <i>TP53</i> mutation      | 4 (12)            | 4 (40)                | 0.060   |
| <i>NPM1</i> mutation      | 6 (18)            | 0                     | 0.300   |
| <i>RAS</i> mutation       | 8 (24)            | 2 (20)                | >0.99   |

**Figure 1:** Kaplan-Meier curves showing (A) overall survival (OS) and (B) event-free survival (EFS) rates of the patients treated with idarubicin, cytarabine (IA) and nivolumab who later proceeded to allogeneic stem cell transplantation (N=19).

A

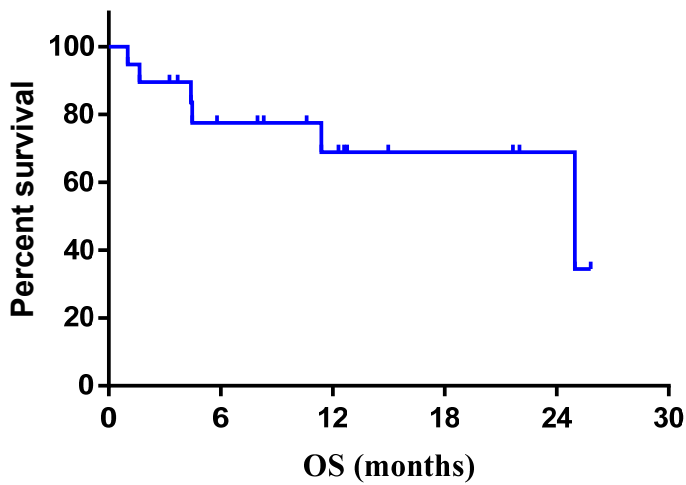

B

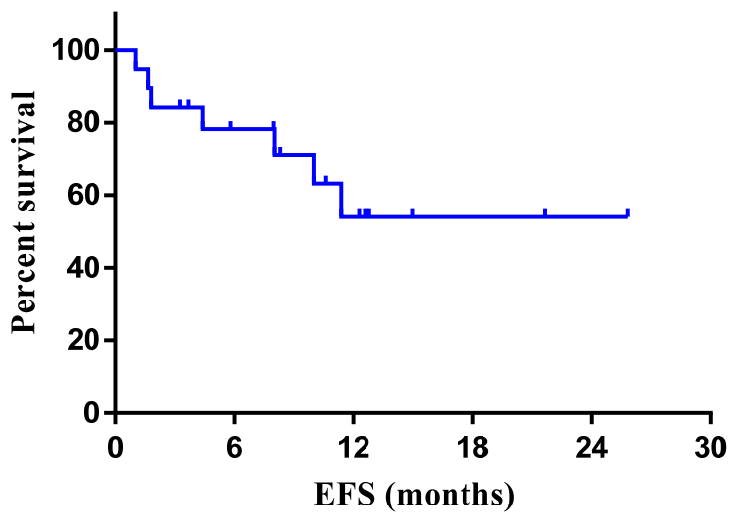

**Figure 2:** Kaplan-Meier curves showing (A) overall survival (OS), (B) event-free survival (EFS) and (C) relapse-free survival (RFS) rates of the responding patients who continued IA and nivolumab beyond remission vs those who received allogeneic stem cell transplantation (allo-SCT)

A

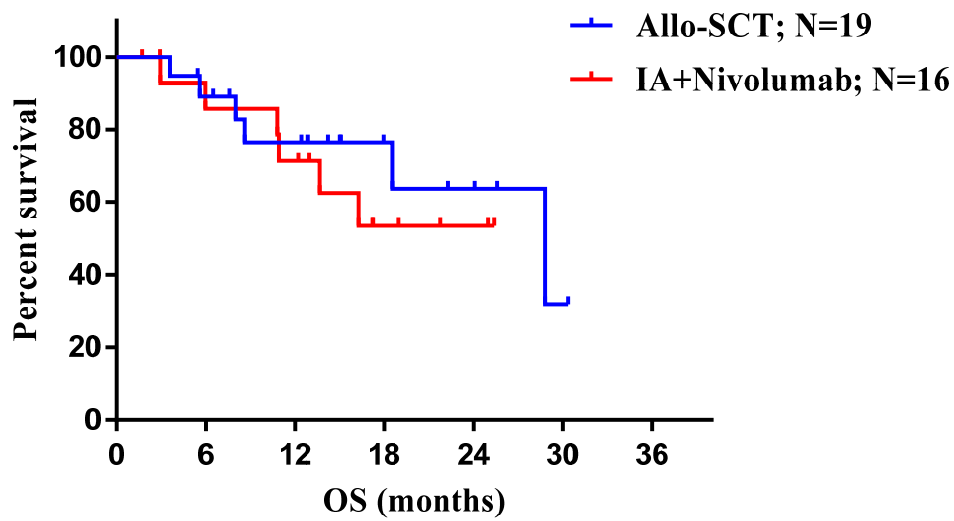

|                            |                 |                 |
|----------------------------|-----------------|-----------------|
| # deaths/events            | 6               | 6               |
| Median survival            | 28.81           | Undefined       |
| Hazard Ratio (logrank)     | A/B             | B/A             |
| Ratio (and its reciprocal) | 0.7085          | 1.411           |
| 95% CI of ratio            | 0.2247 to 2.234 | 0.4476 to 4.451 |

**B**

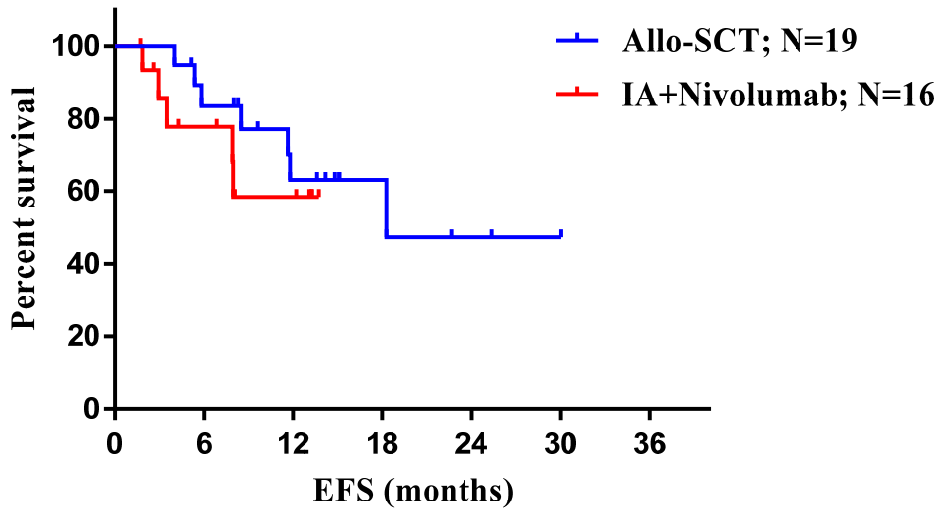

| # deaths/events            | 7               | 5               |
|----------------------------|-----------------|-----------------|
| Median survival            | 18.29           | Undefined       |
| Hazard Ratio (logrank)     | A/B             | B/A             |
| Ratio (and its reciprocal) | 0.6577          | 1.52            |
| 95% CI of ratio            | 0.1955 to 2.213 | 0.4519 to 5.116 |

**C**

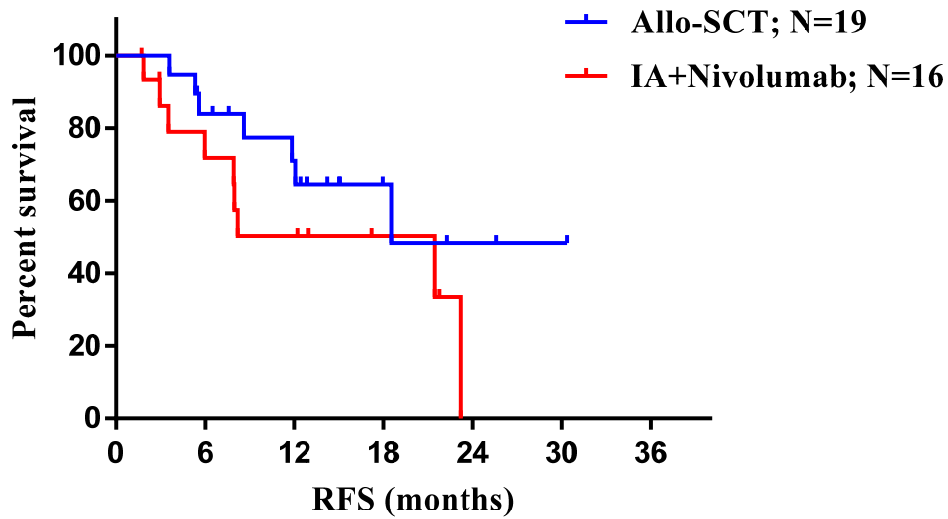

| # deaths/events            | 7              | 9               |
|----------------------------|----------------|-----------------|
| Median survival            | 18.54          | 21.46           |
| Hazard Ratio (logrank)     | A/B            | B/A             |
| Ratio (and its reciprocal) | 0.5192         | 1.926           |
| 95% CI of ratio            | 0.191 to 1.411 | 0.7085 to 5.236 |

**Figure 3:** Quantification of leukemic progenitor cells and T-cells using Cytof mass cytometry at baseline and during consolidation therapy

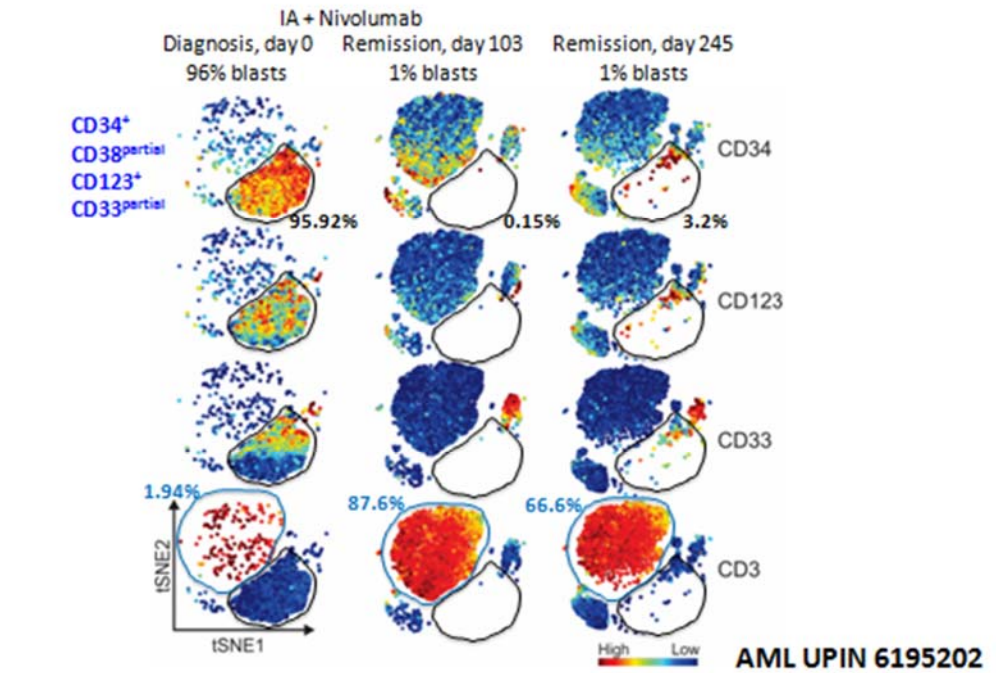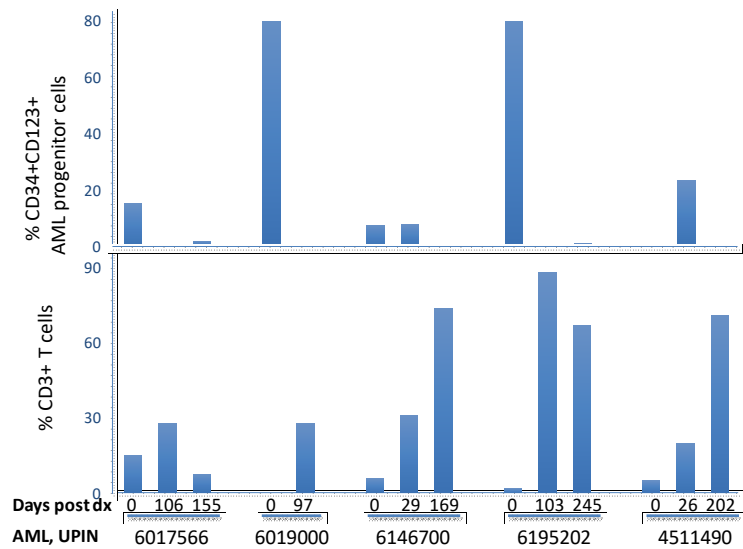

Supplement: NIHMS1537542-supplement-1.pdf [file NIHMS1537542-supplement-1.pdf]
